# Supplementary material for: Frontier orbital stability of nitroxyl organic radicals probed by means of inner shell resonantly enhanced valence band photoelectron spectroscopy
Source: Royal Society of Chemistry journal article supplement (doi:10.1039/d1cp05264k), 2021-12-22
Supplement: d1cp05264k1.pdf [file d1cp05264k1.pdf]

## Electronic Supplementary Information

Frontier orbitals stability of nitroxyl organic radicals probed by means of inner shell resonantly enhanced photoelectron spectroscopy

by R. Totani,\* I. Ljubić,\* A. Ciavardini, C. Grazioli, F. Galdenzi, M. de Simone and M. Coreno

### Resonant Photoelectron Spectroscopy (ResPES)

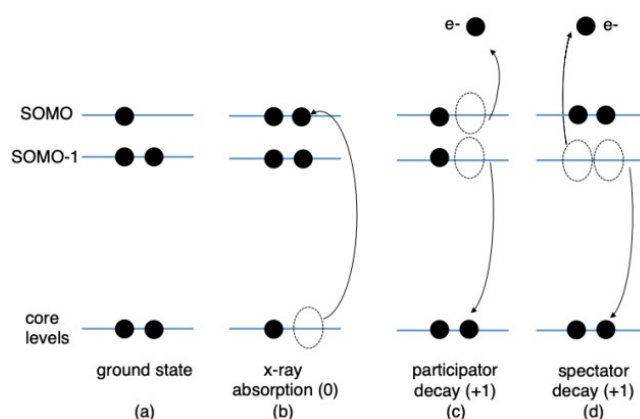

**Figure S1.** X-ray absorption-induced transition from the ground state core level to (a) an unoccupied or, in the case of radicals, (b) singly occupied molecular orbital (SOMO) level. From this excited state, two possible core-hole decay paths are shown: (c) participator decay and (d) spectator decay, leaving the system in an ionized +1 charged state.

In a Resonant Photoelectron Spectroscopy (ResPES) experiment (Fig.S1), the incident photon energy is varied across the resonances of the absorption edges under investigation, promoting a core electron into a resonant bound state (unoccupied orbitals, single occupied molecular orbitals - SOMO or Rydberg states). Then, the electrons emitted upon the non-radiative de-excitation processes are monitored.<sup>1-4</sup> When a non-radiative de-excitation occurs, the core hole is filled again and a valence electron can be emitted following

two different decay paths. In the "participator decay" (Fig. S1c), the photoexcited electron itself is removed leaving the system in a valence single-hole state. In the "spectator decay" (Fig. S1d), a different electron fills the core-hole and a second electron is ejected, leaving the system in a valence two-hole/one-particle state. The former final state is equivalent to those accessible by direct PES and the corresponding decay channel is known as Resonant Photoemission, the latter to an Auger transition and is called Resonant Auger.

In ResPES, however, there are some additional advantages with respect to normal PES. First, the transition matrix elements describing the process are Coulomb-type rather than dipole-type, therefore ResPES could give access to cationic states normally forbidden via conventional PES, because of unfavourable dipole selection rules or of a small cross section. Second, for polyatomic molecules with several chemically non-equivalent atoms of the same species, ResPES is a powerful tool for the study of site-selected processes. Indeed, the core electron is selected from a specific atomic site, by tuning the photon energy on the chosen absorption threshold, below the core-electron ionization threshold. Therefore the subsequent non-radiative decay allows for the disentanglement of the electron emission spectra from core holes of different atoms of the same kind and to address questions on site- and state-selectivity in inner-shell excitation and decay. This is an important difference with respect to KVV Auger spectra, resulting from the unresolved superposition of decays of the same atomic species located in different molecular sites.

1. M.N. Piancastelli, *J. Electron Spectrosc. Relat. Phenom.*, 2000, **107**, 1.
2. R. Feifel and M.N. Piancastelli, *J. Electron Spectrosc. Relat. Phenom.*, 2011, **183**,10.
3. P. Bolognesi P. O'Keeffe, Y. Ovcharenko, L. Avaldi and V. Carravetta, *J. Chem. Phys.*, 2012, **136**, 154308.
4. P. A. Brühwiler, O. Karis, and N. Mårtensson, *Rev. Mod. Phys.*,2002, **74**, 3, 703.

**Table S1.** The used Cartesian geometries (in Å) of the four NRs optimized at the B3LYP-D3/aug-cc-pVTZ level

**TEMPO**

|   |           |           |           |
|---|-----------|-----------|-----------|
| H | 1.237999  | 1.414879  | -1.583387 |
| H | 2.153042  | 1.898711  | -0.168563 |
| H | -0.000000 | 3.149004  | -0.349911 |
| H | -0.000000 | 2.178839  | 1.103008  |
| H | -2.153041 | 1.898713  | -0.168566 |
| H | -1.237998 | 1.414877  | -1.583387 |
| H | 1.676121  | -1.208983 | 1.775275  |
| H | 2.769664  | 0.168318  | 1.567046  |
| H | 1.109511  | 0.432873  | 2.096640  |
| H | 2.027629  | -0.831081 | -1.936330 |
| H | 3.310649  | -0.319016 | -0.828854 |
| H | 2.454974  | -1.848513 | -0.559342 |
| H | -1.109512 | 0.432875  | 2.096640  |
| H | -2.769665 | 0.168312  | 1.567048  |
| H | -1.676114 | -1.208983 | 1.775275  |
| H | -2.454981 | -1.848510 | -0.559336 |
| H | -3.310648 | -0.319010 | -0.828860 |
| H | -2.027625 | -0.831088 | -1.936328 |
| N | 0.000000  | -0.749806 | -0.210150 |
| C | 1.325784  | -0.070906 | -0.029025 |
| C | 1.241091  | 1.392326  | -0.490075 |
| C | 0.000000  | 2.119652  | 0.012829  |
| C | -1.241091 | 1.392326  | -0.490076 |
| C | -1.325786 | -0.070904 | -0.029025 |
| C | 1.740419  | -0.172427 | 1.449003  |
| C | 2.344318  | -0.820390 | -0.893397 |
| C | -1.740418 | -0.172427 | 1.449003  |
| C | -2.344319 | -0.820389 | -0.893396 |
| O | -0.000001 | -2.019342 | -0.065258 |

**DTBN**

|   |           |           |           |
|---|-----------|-----------|-----------|
| N | -0.003163 | 0.532286  | -0.196316 |
| O | 0.031616  | 1.809575  | -0.120116 |
| C | 1.353390  | -0.113363 | -0.012671 |
| C | 1.828866  | 0.175407  | 1.420961  |
| C | 2.295176  | 0.565422  | -1.018853 |
| C | 1.375432  | -1.619602 | -0.277499 |
| C | -1.497467 | -0.678326 | 1.408719  |
| C | -2.413535 | 0.984914  | -0.211459 |
| C | -1.360779 | -0.112552 | -0.013546 |

|   |           |           |           |
|---|-----------|-----------|-----------|
| C | -1.607425 | -1.202144 | -1.070048 |
| H | 2.337118  | 1.636805  | -0.846636 |
| H | 1.951972  | 0.393117  | -2.039474 |
| H | 3.297620  | 0.148916  | -0.916803 |
| H | 2.395970  | -1.970324 | -0.123185 |
| H | 1.098527  | -1.853929 | -1.303321 |
| H | 0.737294  | -2.181550 | 0.399421  |
| H | 2.862579  | -0.150875 | 1.541265  |
| H | 1.220984  | -0.348763 | 2.156971  |
| H | 1.774163  | 1.243857  | 1.619419  |
| H | -1.320051 | 0.103449  | 2.146454  |
| H | -2.315539 | 1.772259  | 0.529880  |
| H | -2.509405 | -1.059886 | 1.552070  |
| H | -0.806790 | -1.496626 | 1.598845  |
| H | -3.401969 | 0.533728  | -0.121796 |
| H | -2.323540 | 1.440181  | -1.195923 |
| H | -2.665815 | -1.463733 | -1.066032 |
| H | -1.050309 | -2.114290 | -0.885436 |
| H | -1.355537 | -0.833470 | -2.064211 |

**nit8**

|   |           |           |           |
|---|-----------|-----------|-----------|
| H | -0.734706 | -0.299117 | -1.571307 |
| H | 0.155090  | -2.330453 | -0.567009 |
| H | -0.002049 | -1.660691 | 1.060578  |
| H | 2.095228  | -1.022496 | 2.010405  |
| H | 3.460471  | -0.606819 | 0.973066  |
| H | 2.779283  | -2.242646 | 0.921907  |
| H | 2.547859  | -1.971929 | -1.589133 |
| H | 3.104841  | -0.290373 | -1.537987 |
| H | 1.541451  | -0.679446 | -2.259503 |
| H | 0.030657  | 3.060272  | -0.477858 |
| H | -1.550516 | 2.365111  | -0.916340 |
| H | -0.105004 | 1.973718  | -1.862541 |
| H | -0.572455 | 0.446762  | 2.150806  |
| H | -1.734563 | 1.608570  | 1.490434  |
| H | -0.083569 | 2.122393  | 1.887706  |
| H | -3.624640 | -1.867581 | 0.545405  |
| H | -1.997305 | -2.450313 | 0.597160  |
| N | -2.644335 | -1.716760 | 0.378945  |
| N | 1.230358  | 0.682414  | 0.095174  |
| C | 0.200398  | -1.411653 | 0.017134  |
| C | 1.582692  | -0.748235 | -0.078636 |
| C | 2.539357  | -1.184093 | 1.028094  |
| C | 2.231936  | -0.936488 | -1.456023 |
| C | -0.223529 | 0.992606  | 0.063821  |
| C | -0.787453 | -0.345030 | -0.480964 |
| C | -0.688477 | 1.308192  | 1.491816  |
| C | -0.480573 | 2.178133  | -0.859384 |
| C | -2.269181 | -0.535014 | -0.181852 |
| O | -3.082654 | 0.330625  | -0.454035 |
| O | 2.108846  | 1.573495  | 0.298247  |

**nit9**

|   |           |           |           |
|---|-----------|-----------|-----------|
| H | 0.081578  | -2.381507 | 0.254082  |
| H | -1.768365 | -1.255764 | -2.052824 |
| H | -3.264658 | -0.846740 | -1.202898 |
| H | -2.521081 | -2.438248 | -0.966335 |
| H | -2.484682 | -2.062817 | 1.547568  |
| H | -3.234108 | -0.470975 | 1.322754  |
| H | -1.715267 | -0.615153 | 2.218710  |
| H | -0.219551 | 2.763630  | 1.103171  |
| H | 1.451294  | 2.157707  | 1.247725  |
| H | 0.127720  | 1.327556  | 2.077294  |
| H | 0.448355  | 1.149451  | -2.225119 |
| H | 1.648098  | 2.044696  | -1.272231 |
| H | -0.009228 | 2.664166  | -1.435239 |
| H | 3.758790  | -1.891449 | -0.252226 |
| H | 2.193482  | -2.468107 | -0.679233 |
| N | 2.759323  | -1.786857 | -0.207501 |
| N | -1.254784 | 0.633510  | -0.164755 |
| C | -0.115071 | -1.326418 | 0.122679  |
| C | -1.521573 | -0.807995 | 0.059885  |
| C | -2.317420 | -1.378081 | -1.119889 |
| C | -2.286046 | -1.004415 | 1.376818  |
| C | 0.183001  | 1.010912  | -0.073412 |
| C | 0.805392  | -0.366205 | 0.035149  |
| C | 0.598415  | 1.765679  | -1.338498 |
| C | 0.404904  | 1.874080  | 1.176111  |
| C | 2.283619  | -0.536323 | 0.075268  |
| O | 3.029926  | 0.385387  | 0.364295  |
| O | -2.184360 | 1.490810  | -0.234803 |

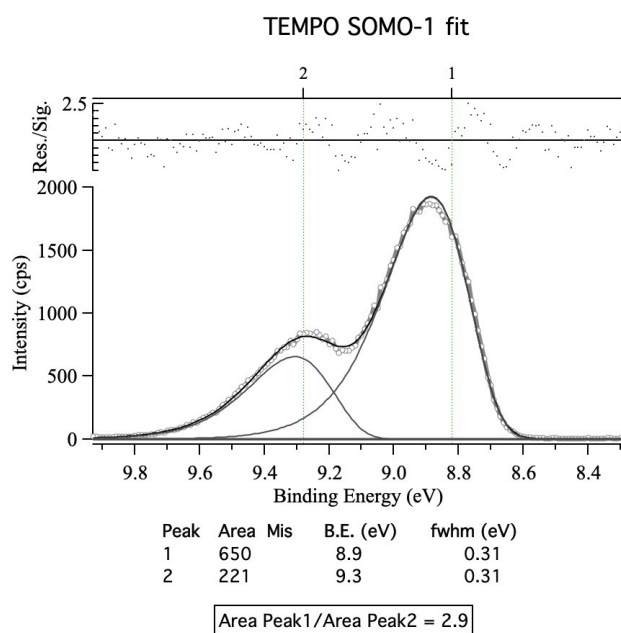

**Figure S2.** TEMPO SOMO-1 photoelectron spectrum, with its fitting analysis. Skewed Gaussians were employed, considering the unresolved intramolecular vibration modes progression, usually giving rise to an asymmetric tail on the high binding energy side of photoemission peaks.<sup>5-7</sup>

5. J. Lüder, M. de Simone, R. Totani, M. Coreno, C. Grazioli, B. Sanyal, O. Eriksson, B. Brena and C. Puglia, *J. Chem. Phys.*, 2015, **142**, 074305.
6. I. Minkov, F. Gel'mukhanov, H. Ågren, R. Friedlein, C. Suess and W. R. Salaneck, *J. Phys. Chem. A* 2005, **109**, 7, 1330.
7. O. Kwon, V. Coropceanu, N. E. Gruhn, J. C. Durivage, J. G. Laquindanum, H. E. Katz, J. Cornil and J. L. Brédas, *J. Chem. Phys.*, 2004, **120**, 17, 8186.

**Table S2.** The vertical ionization thresholds (in eV at the (TD)-B3LYP//mixed level) for the valence ionizations of the four NRs, and the norms of the Dyson spin orbitals (multiplied by  $10^5$ ) between the N1s/O1s  $\rightarrow \pi^*$  CV states and the valence ionized states.

| TEMPO              |            |      |       |
|--------------------|------------|------|-------|
| state              | (TD)-B3LYP | O    | N     |
| 1 <sup>1</sup> A'  | 7.28       | 1.35 | 10.32 |
| 1 <sup>3</sup> A'' | 8.51       | 1.37 | 9.86  |
| 1 <sup>1</sup> A'' | 9.37       | 0.96 | 6.27  |
| 2 <sup>1</sup> A'  | 10.01      | 1.00 | 7.27  |
| 3 <sup>1</sup> A'  | 10.45      | 1.00 | 7.71  |
| 2 <sup>1</sup> A'' | 10.46      | 1.00 | 7.27  |
| 3 <sup>1</sup> A'' | 10.80      | 0.87 | 7.07  |
| 4 <sup>1</sup> A'' | 11.08      | 0.96 | 8.24  |
| 4 <sup>1</sup> A'  | 11.37      | 0.98 | 7.14  |
| 5 <sup>1</sup> A'' | 11.40      | 0.95 | 7.43  |
| 6 <sup>1</sup> A'' | 11.67      | 0.90 | 7.40  |
| 5 <sup>1</sup> A'  | 11.91      | 1.01 | 7.57  |

| DTBN                           |            |      |      |
|--------------------------------|------------|------|------|
| state                          | (TD)-B3LYP | O    | N    |
| 1 <sup>1</sup> A <sub>1</sub>  | 7.21       | 1.14 | 9.40 |
| 1 <sup>3</sup> A <sub>1</sub>  | 8.50       | 1.20 | 9.03 |
| 2 <sup>1</sup> A <sub>1</sub>  | 9.42       | 0.79 | 6.83 |
| 3 <sup>1</sup> A <sub>1</sub>  | 10.44      | 0.96 | 6.82 |
| 4 <sup>1</sup> A <sub>1</sub>  | 10.78      | 1.61 | 7.91 |
| 5 <sup>1</sup> A <sub>1</sub>  | 10.82      | 1.24 | 5.35 |
| 6 <sup>1</sup> A <sub>1</sub>  | 11.29      | 1.18 | 6.10 |
| 7 <sup>1</sup> A <sub>1</sub>  | 11.44      | 0.89 | 6.36 |
| 8 <sup>1</sup> A <sub>1</sub>  | 11.50      | 0.84 | 7.16 |
| 9 <sup>1</sup> A <sub>1</sub>  | 11.57      | 0.80 | 6.25 |
| 10 <sup>1</sup> A <sub>1</sub> | 11.96      | 0.99 | 4.00 |
| 11 <sup>1</sup> A <sub>1</sub> | 12.09      | 1.55 | 7.65 |

| nit8                           |            |                  |                  |                  |                  |
|--------------------------------|------------|------------------|------------------|------------------|------------------|
| state                          | (TD)-B3LYP | O <sub>amd</sub> | N <sub>amd</sub> | O <sub>nit</sub> | N <sub>nit</sub> |
| 1 <sup>1</sup> A <sub>1</sub>  | 7.16       | 0.22             | 22.17            | 0.14             | 1.08             |
| 1 <sup>3</sup> A <sub>1</sub>  | 8.50       | 0.48             | 24.28            | 0.15             | 1.96             |
| 2 <sup>1</sup> A <sub>1</sub>  | 8.15       | 0.16             | 15.79            | 0.10             | 2.04             |
| 3 <sup>1</sup> A <sub>1</sub>  | 8.58       | 0.16             | 16.13            | 0.12             | 0.76             |
| 4 <sup>1</sup> A <sub>1</sub>  | 9.67       | 0.16             | 13.35            | 0.15             | 0.84             |
| 5 <sup>1</sup> A <sub>1</sub>  | 10.61      | 0.22             | 14.60            | 0.35             | 0.91             |
| 6 <sup>1</sup> A <sub>1</sub>  | 10.74      | 0.13             | 18.91            | 0.20             | 1.17             |
| 7 <sup>1</sup> A <sub>1</sub>  | 11.04      | 0.34             | 16.22            | 0.80             | 1.06             |
| 8 <sup>1</sup> A <sub>1</sub>  | 11.34      | 0.31             | 12.77            | 0.12             | 1.68             |
| 9 <sup>1</sup> A <sub>1</sub>  | 11.56      | 0.24             | 18.17            | 0.24             | 0.72             |
| 10 <sup>1</sup> A <sub>1</sub> | 11.80      | 0.18             | 14.02            | 0.31             | 0.82             |
| 11 <sup>1</sup> A <sub>1</sub> | 11.87      | 0.20             | 15.80            | 0.29             | 1.13             |

| nit9                           |            |                  |                  |                  |                  |
|--------------------------------|------------|------------------|------------------|------------------|------------------|
| state                          | (TD)-B3LYP | O <sub>amd</sub> | N <sub>amd</sub> | O <sub>nit</sub> | N <sub>nit</sub> |
| 1 <sup>1</sup> A <sub>1</sub>  | 7.29       | 1.05             | 11.27            | 0.64             | 4.31             |
| 1 <sup>3</sup> A <sub>1</sub>  | 8.61       | 1.21             | 14.46            | 0.66             | 4.44             |
| 2 <sup>1</sup> A <sub>1</sub>  | 8.29       | 0.75             | 8.07             | 0.45             | 3.35             |
| 3 <sup>1</sup> A <sub>1</sub>  | 8.69       | 0.74             | 8.24             | 0.45             | 3.15             |
| 4 <sup>1</sup> A <sub>1</sub>  | 9.13       | 0.77             | 8.14             | 0.46             | 2.82             |
| 5 <sup>1</sup> A <sub>1</sub>  | 9.79       | 0.74             | 7.95             | 0.55             | 2.91             |
| 6 <sup>1</sup> A <sub>1</sub>  | 10.96      | 0.76             | 7.97             | 0.57             | 3.12             |
| 7 <sup>1</sup> A <sub>1</sub>  | 11.22      | 0.81             | 7.67             | 0.43             | 2.88             |
| 8 <sup>1</sup> A <sub>1</sub>  | 11.40      | 0.86             | 8.33             | 1.20             | 3.20             |
| 9 <sup>1</sup> A <sub>1</sub>  | 11.53      | 0.36             | 2.83             | 0.00             | 0.30             |
| 10 <sup>1</sup> A <sub>1</sub> | 11.63      | 0.76             | 7.21             | 0.50             | 2.87             |
| 11 <sup>1</sup> A <sub>1</sub> | 11.88      | 0.74             | 8.26             | 0.52             | 3.10             |

**Table S3.** The lowest core-to-valence (CV) excitation energies and core-electron binding energies (CEBE, for DTBN only; the CEBE values for the remaining NRs can be found in Refs. 25 and 27) calculated using the  $\Delta$ DFT//mixed method (eV). No relativistic corrections for the 1s core contraction were applied.

| method                         | TEMPO |       | DTBN  |       | nit8             |                  |                  |                  | nit9             |                  |                  |                  |
|--------------------------------|-------|-------|-------|-------|------------------|------------------|------------------|------------------|------------------|------------------|------------------|------------------|
|                                | N     | O     | N     | O     | N <sub>nit</sub> | O <sub>nit</sub> | N <sub>amd</sub> | O <sub>amd</sub> | N <sub>nit</sub> | O <sub>nit</sub> | N <sub>amd</sub> | O <sub>amd</sub> |
| $\Delta$ B3LYP<br>CV           | 399.3 | 529.0 | 399.4 | 529.0 | 399.4            | 529.3            | 401.7            | 531.3            | 399.4            | 529.3            | 400.8            | 530.5            |
| $\Delta$ B3LYP<br>CEBE         |       |       | 405.8 | 535.9 |                  |                  |                  |                  |                  |                  |                  |                  |
| $\Delta$ CAM-<br>B3LYP<br>CV   | 399.3 | 529.0 | 399.3 | 529.1 | 399.4            | 529.3            | 401.7            | 531.3            | 399.4            | 529.3            | 400.8            | 530.6            |
| $\Delta$ CAM-<br>B3LYP<br>CEBE |       |       | 405.9 | 536.1 |                  |                  |                  |                  |                  |                  |                  |                  |
| expt.<br>CV                    | 399.4 | 529.3 | 399.4 | 529.3 | 399.4            | 529.8            | 401.8            | 531.9            | 399.5            | 529.7            | 401.8            | 531.3            |
| expt.<br>CEBE                  |       |       | 406.4 | 537.0 |                  |                  |                  |                  |                  |                  |                  |                  |



**Table S4.** Comparison of the performances of several methods used to calculate the vertical ionization energies (eV) in TEMPO. The triplet coupled states (formally, the ionizations from the  $\beta$  spin-orbitals) are given in parentheses. The average absolute deviations (AAD) are calculated with respect to the IP-UADC(3) singlet states.

| state              | (TD)-B3LYP  | (TD)-CAM-B3LYP | EPT-P3+       | IP-UADC(3) <sup>a</sup> |
|--------------------|-------------|----------------|---------------|-------------------------|
| 1 <sup>1</sup> A'  | 7.28        | 7.53           | 7.42          | 7.5636                  |
| 1 <sup>3</sup> A'' | 8.51        | 8.73           | 9.06          | 9.3336                  |
| 1 <sup>1</sup> A'' | 9.37        | 9.70           | 9.63          | 9.5483                  |
| 2 <sup>1</sup> A'  | 10.01       | 10.95          | (10.33) 10.99 | (10.1730) 10.6061       |
| 3 <sup>1</sup> A'  | 10.45       | 11.41          | (10.96) 11.34 | (11.1088) 11.1279       |
| 2 <sup>1</sup> A'' | 10.46       | 11.62          | (11.30) 11.43 | (11.1699) 11.5106       |
| 3 <sup>1</sup> A'' | 10.80       | 11.69          | (11.60) 11.57 | (11.5387) 11.7879       |
| 4 <sup>1</sup> A'' | 11.08       | 12.21          | (11.84) 12.26 | (11.8347) 12.0296       |
| 4 <sup>1</sup> A'  | 11.37       | 12.39          | (12.26) 12.46 | (12.0836) 12.4244       |
| 5 <sup>1</sup> A'' | 11.40       | 12.56          | (12.75) 12.76 | (12.4321) 12.4968       |
| 6 <sup>1</sup> A'' | 11.67       | 12.69          | (12.78) 12.90 | (12.8374) 12.8804       |
| 5 <sup>1</sup> A'  | 11.91       | 13.06          | (12.80) 13.18 | (12.9658)               |
| <b>AAD</b>         | <b>0.83</b> | <b>0.18</b>    | <b>0.18</b>   |                         |

<sup>a</sup>IP-UADC(3)/aug(nH)-cc-pVTZ level results taken from Ref. 69

**Table S5.** The equilibrium geometries of the lowest CV states (N 1s and O 1s) of DTBN (in Å) calculated at the B3LYP-D3//mixed level.

**N 1s**

|   |               |               |               |
|---|---------------|---------------|---------------|
| H | 2.1805501835  | 1.7650443735  | -0.5876432966 |
| H | 1.9167101185  | 0.6806736223  | -1.9656504811 |
| H | 3.2777552008  | 0.3831325745  | -0.8650189892 |
| H | 2.4588785655  | -1.8880966793 | -0.5591986075 |
| H | 1.0420737274  | -1.6624348605 | -1.5848540155 |
| H | 0.8691819588  | -2.2735148537 | 0.0807130228  |
| H | 2.8476836988  | -0.3455506047 | 1.4754270095  |
| H | 1.2321435531  | -0.7978084319 | 2.0244807581  |
| H | 1.6317233269  | 0.9193046555  | 1.7921307002  |
| H | -1.2425990241 | 0.4842716103  | 2.0717604065  |
| H | -2.2380240291 | 1.8531354892  | 0.1259900853  |
| H | -2.5915237553 | -0.6221702825 | 1.7229182883  |
| H | -0.9480684167 | -1.2592513949 | 1.8359086768  |
| H | -3.3594296626 | 0.5521063309  | -0.3620698776 |
| H | -2.1526539682 | 1.1783280813  | -1.5051987121 |
| H | -2.6507145212 | -1.5948244633 | -0.8254099040 |
| H | -1.0764131507 | -2.2592790660 | -0.4351291470 |
| H | -1.2710284991 | -1.2047548053 | -1.8540039036 |
| N | -0.0061673767 | 0.4586011247  | -0.1946810198 |
| C | 1.3673946451  | -0.1519230987 | -0.0492827046 |

```

C    1.7879770590  -0.0870803481  1.4109258862
C    2.2445934704   0.7340482586 -0.9247480230
C    1.4107218168  -1.5808311287  -0.5623964452
C   -1.5422610084  -0.4020087569  1.5127264137
C   -2.3428264780   0.9434139498 -0.4556666484
C   -1.3736440887  -0.1306114472  0.0292544665
C   -1.5805864097  -1.3775757657 -0.8217713186
O    0.0379360639   1.8261389166   0.3611673799

```

**O 1s**

```

H    2.3224512073   1.7571629192  -0.5401678756
H    2.0693060030   0.7040153838  -1.9393351944
H    3.3405130733   0.3241491128  -0.7568359533
H    2.4700327276  -1.8769463321  -0.5594255296
H    1.0709208166  -1.6536564728  -1.6157214276
H    0.8629882138  -2.2640626070   0.0403281379
H    2.7646771812  -0.3417328876   1.5106139141
H    1.1369128526  -0.7903075522   2.0062805517
H    1.5649668986   0.9184876445   1.8171386417
H   -1.1513331652   0.4698397946   2.0893139640
H   -2.2951210063   1.8505440189   0.1886670858
H   -2.5200270495  -0.5969528695   1.7453782477
H   -0.8897979812  -1.2634589657   1.8061078778
H   -3.3812880749   0.5349066565  -0.2798663225
H   -2.2404498531   1.2131371226  -1.4603946436
H   -2.6982138091  -1.5964532544  -0.7333987925
H   -1.0923233607  -2.2488468133  -0.4584160295
H   -1.3948496931  -1.2137745332  -1.8666763571
N   -0.0129811064   0.4365582252  -0.4329848500
C    1.3340617609  -0.1304243062  -0.0778285662
C    1.7076196327  -0.0812167158   1.4082271793
C    2.3293684981   0.7215523848  -0.8787724684
C    1.4221594750  -1.5692371392  -0.5860413127
C   -1.4731647218  -0.3925146545   1.5037451300
C   -2.3770520169   0.9455963137  -0.4103196818
C   -1.3417617626  -0.1103421022   0.0067250840
C   -1.6316950114  -1.3734504135  -0.8128520294
O    0.0334632715   1.7679110426   0.1771912203

```

**Table S6.** The norms of the Dyson spin orbitals between the N1s/O1s  $\rightarrow$   $\pi^*$  CV states and the lowest singlet and triplet valence ionized states calculated at the N 1s and O 1s CV minimum geometries

|          |       | B3LYP// mixed |       |         | CAM-B3LYP//mixed |       |         |       |         |
|----------|-------|---------------|-------|---------|------------------|-------|---------|-------|---------|
| state    | N     | ratio N       | O     | ratio O | state            | N     | ratio N | O     | ratio O |
| $1^1A_1$ | 14.80 |               | 1.580 |         | $1^1A_1$         | 14.61 |         | 1.513 |         |
| $1^3A_1$ | 15.43 | 0.96          | 1.600 | 0.99    | $1^3A_1$         | 15.27 | 0.96    | 1.545 | 0.98    |

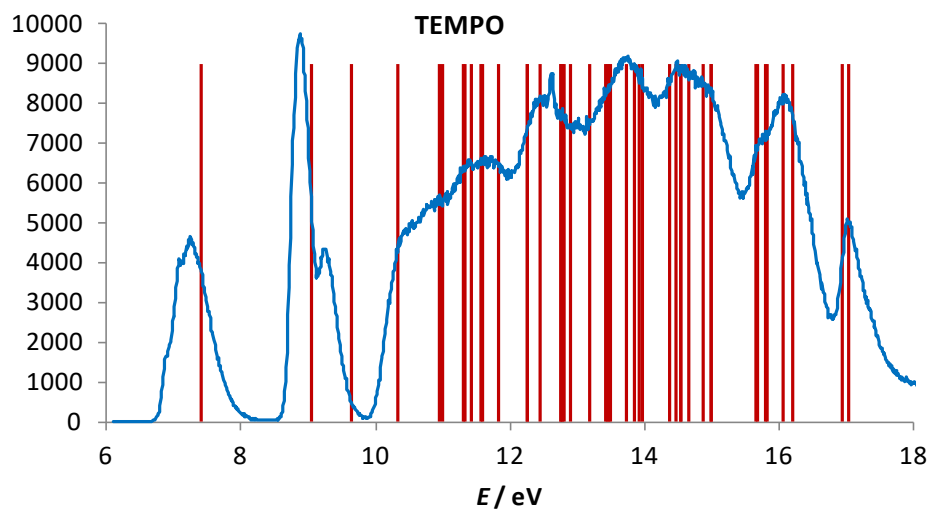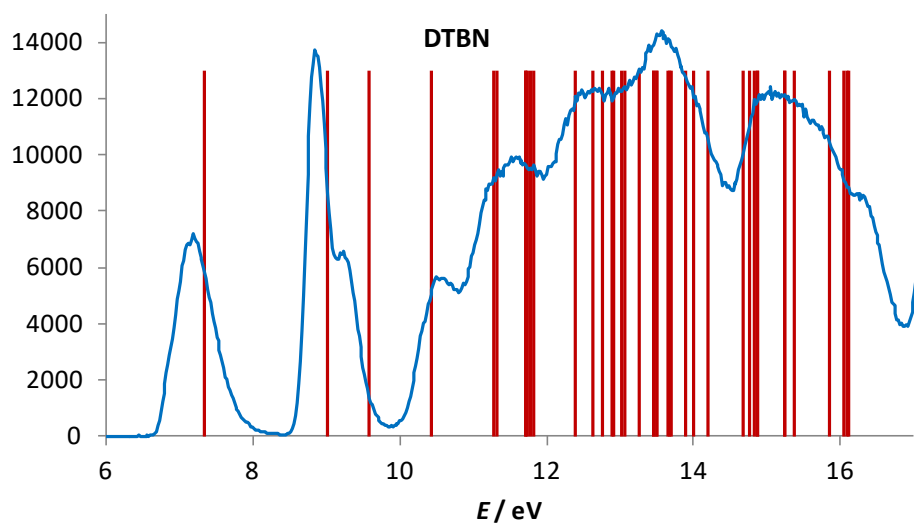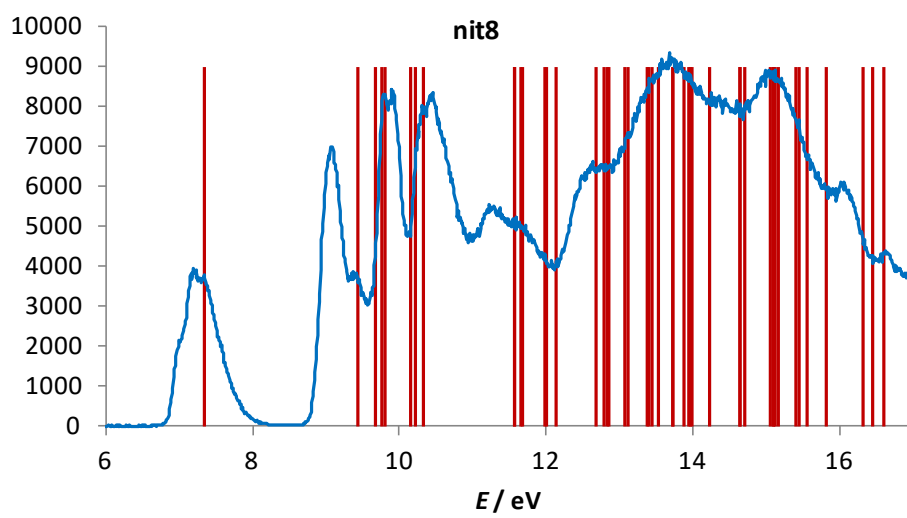

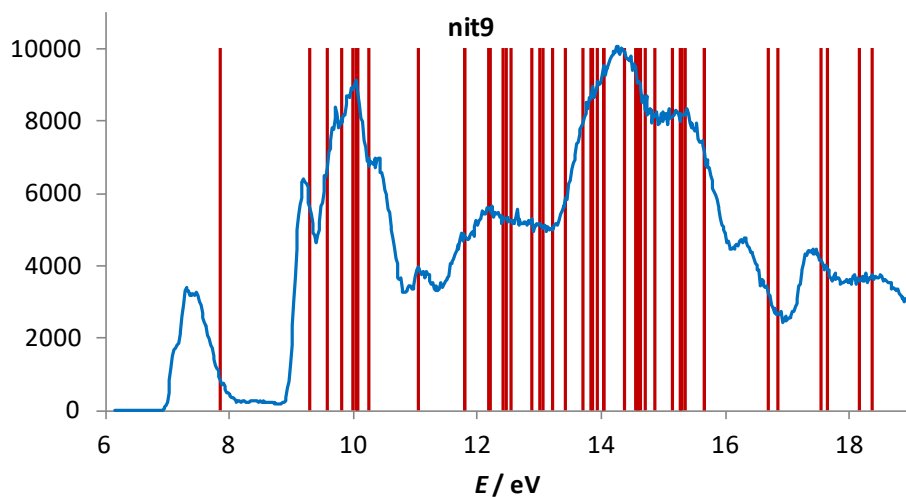

**Figure S3.** The experimental valence PES spectra of the four NRs with superimposed EPT-P3+/cc-pVTZ stick spectra

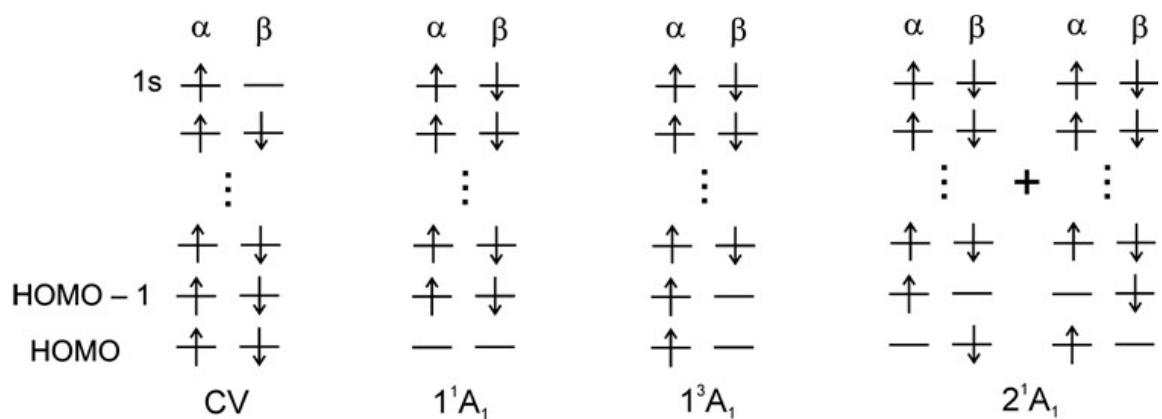

**Figure S4.** Schematic representations of the electronic configurations of the initial (CV) and three of the final states ( $1^1A_1$ ,  $1^3A_1$ , and  $2^1A_1$  (for simplicity, the levels of the  $\alpha$  and  $\beta$  spin blocks are drawn as having equal orbital energy))
